# Supplementary material for: Readjoiner: a fast and memory efficient string graph-based sequence assembler
Source: Springer Nature journal article supplement (doi:10.1186/1471-2105-13-82), 2012-05-06
Supplement: 12859_2011_5454_MOESM1_ESM.pdf [file 12859_2011_5454_MOESM1_ESM.pdf]

# **Additional file 1 for manuscript Readjoinder: a fast and memory efficient string graph-based sequence assembler**

*Giorgio Gonnella* *Stefan Kurtz*  
Center for Bioinformatics  
University of Hamburg

March 1, 2012

This document describes implementation techniques for the methods and algorithms described in the main document. Moreover, it gives a lemma and a theorem (including proofs) characterizing transitive SPMs, and an algorithm to enumerate irreducible and non-redundant suffix-prefix matches. Furthermore, a method to recognize internally contained reads is given, as well as results for a benchmark set with reads of variable length. Finally, an example of SPM-relevant suffixes and their corresponding lcp-interval is presented.

## **1 Implementation of counts**

In this section we describe how to efficiently implement the counters. Recall that we have  $d$  counters, one for each initial  $k$ -mer. The sum of all counts is exactly the number  $g$  of all SPM-relevant suffixes. This implies that the expected value of a counter is  $\frac{g}{d}$ . As  $g \leq n$  and  $d \geq m$ , we have  $\frac{g}{d} \leq \frac{n}{d} \leq \frac{n}{m}$ . As the average read length  $\frac{n}{m}$  is assumed to be a constant, the expected value of a counter is a constant as well and so we implement the count table  $C$  by a byte array of size  $d$ . The counts stored in this array are in the range from 1 to 255, as each count refers to an integer code that occurs at least once. So 0 is a special value. If the  $i$ th integer code occurs more than 255 times, we set the  $i$ th entry of the byte array to 0, to signify an overflow and store the correct count with key  $i$  in a hash table. Because we use sorted buffers in the counting phase, the array-indices of the counters to be incremented come

in sorted order. So in each round  $q$  consecutive increments by 1 (and this many accesses to the byte array and possibly to the hash table) can be combined into one increment by  $q$ . Thus, for each round, each counter is incremented at most once. This strategy reduces the number of accesses to the hash table. For the datasets of the results section only about 0.2% of all counters have to be stored in the hash table and less than 1% of all increments affect the hash table. Thus the effect of the hash table on the space and the running time is negligible.

## 2 Implementation of partial sums

The partial sums in table  $\pi$  are bounded by  $g$ , the number of SPM-relevant suffixes. For large read sets,  $g$  can be larger than  $2^{32} - 1$ . However, as the partial sum are strictly increasing, one can implement  $\pi$  by a 32 bit integer table PS of size  $d + 1$ , such that  $\text{PS}[i] = \pi[i] \bmod 2^{32}$  for any  $i$ ,  $0 \leq i \leq d$  and an additional integer table of size  $2^{\max\{0, \lceil \log_2 g \rceil - 32\}}$ . Let  $\beta = \lceil \log_2 g \rceil$  and  $\delta$  be some small constant such that each count value in table  $C$  is smaller than  $2^\delta$ . Each value  $\pi[i]$  is in the range from 0 to  $g$  and it can be written as

$$\pi[i] = \pi[i] \bmod 2^\delta + \sum_{j=1}^{\beta-\delta} b_j 2^{\beta-j} \quad (1)$$

where  $b_j \in \{0, 1\}$  for all  $j$ ,  $1 \leq j \leq \beta - \delta$ . So in particular, if  $\pi[i] < 2^\delta$  then  $\pi[i] = \pi[i] \bmod 2^\delta$  and so the bits  $b_1, \dots, b_{\beta-\delta}$  are all 0. As the sequence of partial sums is strictly increasing, we store for each possible combination of bits  $b_1, \dots, b_{\beta-\delta}$  the largest  $i$ ,  $0 \leq i \leq d$  satisfying (1). This value  $i$  is stored at index  $b_1 \dots b_{\beta-\delta}$  of a table  $f$  of size  $2^{\beta-\delta}$ , where the bit sequence  $b_1 \dots b_{\beta-\delta}$  is interpreted as a decimal number. In other words, we store the least significant  $\delta$  bits of  $\pi[i]$  in  $\text{PS}[i]$  and the most significant  $\beta - \delta$  bits are interpreted as an index into table  $f$ .

As the partial sums are computed sequentially in one pass over the count table  $C$ , it is easy to fill table  $f$ . When retrieving  $\pi[i]$  one first determines the smallest  $q$  such that  $i \leq f[q]$  for some  $q$ ,  $0 \leq q \leq 2^{\beta-\delta} - 1$  and returns  $\text{PS}[i] + q \cdot 2^\delta$ . As  $\beta - \delta$  is a very small constant,  $q$  and this  $\pi[i]$  can be determined in constant time.  $\delta$  can be chose such that that the sum of the sizes of table PS and  $f$  is minimized. However, in our implementation we have chosen  $\delta = 32$ .

## 3 Implementation of the partitioning strategy

In our implementation of the partitioning strategy we exploit the fact that the size and content of the tables  $K$  and  $P$  do not change during the insertion phase, so that they can conveniently be stored on temporary files after the partial sums have been computed and before the insertion phase begins. As we do not want to afford the space for the entire table PS, we directly output the sequence of partial sums to a temporary file when they are generated. We only store a small sample of the partial sums in memory, allowing to determine the boundaries at which the different parts of the tables are partitioned. Using a small sample of  $\pi$  instead of  $\pi$  completely leads to a more granular partitioning and thus to a larger variance of the size of the different parts. However, our experiments show that the variance is still very small.

When processing the  $q$  parts, one after the other, the range of values of table  $K$  and  $P$  (only read access) and  $PS$  (read and write access) in the predefined boundaries are mapped from the temporary files into main memory in units of the machine's page size. The access to the temporary files is strictly sequential and only the values on pages at the boundaries of the parts may be mapped more than once. As a consequence, our partitioning strategy only creates a minimal overhead in the IO subsystem of the computer.

## 4 Computation of leaf edges in Algorithm 1

The additional computations in lines 6–12 and line 32 of Algorithm 1 (see main document) deliver the leaf edges. These were omitted in the original algorithm of [1, Algorithm 4.4]. To understand how the computation works, first note that at the end of each iteration of the for-loop,  $stack.top.lcp$  equals  $L_{e+1}$  and  $lastitv$  is undefined. The singleton-interval  $[e]$  representing  $H_e$  has a parent with lcp-value  $\ell = \max\{L_e, L_{e+1}\}$ . So at the start of the  $e$ th iteration we have  $stack.top.lcp = L_e$ . Hence, if  $L_{e+1} \leq stack.top.lcp$ , then the parent of  $[e]$  has lcp-value  $\ell = stack.top.lcp$ . Since  $stack.top.lb \leq e$  and  $stack.top.rb$  will get a value  $\geq e$  in later iterations,  $stack.top$  represents the parent of  $[e]$ . This case is implemented in lines 6–12.

Now suppose that  $L_{e+1} > stack.top.lcp$ . Then the while-loop is not executed and  $lastitv$  remains undefined. So the next statement executed is in line 31.  $L_{e+1} > stack.top.lcp$  implies  $L_{e+1} > L_e$  and so the parent of  $[e]$  has the lcp-value  $L_{e+1}$ . This parent  $(L_{e+1}, e, \perp)$  is pushed on the stack in line 31 and the implicit outgoing leaf edge is processed in line 32.

What remains is an explanation on how to determine if an edge is the first outgoing from an lcp-interval. As the edges processed in line 28 or line 32 are from lcp-intervals which have just been generated (in the line before), these edges are obviously the first edges from the lcp-interval (with undefined right bound). Now look at the identical code fragment in lines 7–11 and 18–22. If the current lcp-interval is not the root-interval (of lcp-value 0), then there was a previous edge outgoing from this lcp-interval (processed either in line 28 or 32) and so  $firstedge$  is false. Otherwise, if the current lcp-interval is the root-interval, then  $firstedge$  is true if and only if  $firstedgefromroot$  is true. The latter boolean variable is true if and only if there was some previously processed edge from the root-interval.  $firstedgefromroot$  is set to false whenever an edge from the root-interval is processed.

## 5 Computation of integer codes for reverse complemented reads

The three steps which involve scanning the reads are extended to process both strands of all reads. This does not require to double the size of the read representation, as all information for the reverse complemented reads can efficiently be extracted from the forward reads. Here we show how to compute the integer codes for the reversed reads from the integer codes of the forward reads in constant time. More precisely, the computation of  $c_{rev} := \varphi_k(s[k]s[k-1] \dots s[1])$  from  $c := \varphi_k(s[1] \dots s[k])$  can be done with  $3k - 1$  bit operations if  $k$  is even and  $3k - 2$  bit operations if  $k$  is odd. These bit operations reverse the order of  $k$  pairs of bits. For

computing the complement of a  $k$ -mer, first note that the following equations hold (where **xor** denotes bitwise exclusive or):

$$\begin{aligned}\varphi(A) &= 0 \text{ xor } 3 = 3 = \varphi(T) \\ \varphi(C) &= 1 \text{ xor } 3 = 2 = \varphi(G) \\ \varphi(G) &= 2 \text{ xor } 3 = 1 = \varphi(C) \\ \varphi(T) &= 3 \text{ xor } 3 = 0 = \varphi(A)\end{aligned}$$

That is, (**xor 3**) applied to the code of a base delivers the code of the complement of the base. Of course, this works for a bit string with an even number of bits, so that for a  $k$ -mer  $u$  of  $2k$  bits,  $\varphi_k(u) \text{ xor } 3$  delivers the integer code of the complement of  $u$ . Thus applying this operation to  $c_{rev}$  gives the integer code of the reverse complement of  $s[1 \dots k]$  in constant time. The window-based approach described in the implementation section can be extended to simultaneously compute the integer code for the reverse complement of the  $k$ -mer in the window.

## 6 Characterization of transitive suffix-prefix matches

The following lemma characterizes an *SPM* by a read and a single *SPM* satisfying a length constraint and a match constraint.

**Lemma 1** Let  $\langle r, t, \ell'' \rangle$  be an *SPM*. Then  $\langle r, t, \ell'' \rangle$  is transitive, if and only if there is an  $s \in \mathcal{R}$  and an *SPM*  $\langle s, t, \ell' \rangle$  such that  $\ell' > \ell''$ ,  $|r| - \ell'' \geq |s| - \ell'$  and  $s[1 \dots |s| - \ell'] = r[|r| - \ell'' - (|s| - \ell') + 1 \dots |r| - \ell'']$ .

**Proof:**

“ $\Rightarrow$ ”: Suppose that  $\langle r, t, \ell'' \rangle$  is transitive. Then, by definition, there is an  $s \in \mathcal{R}$  and two *SPMs*  $\langle r, s, \ell \rangle$  and  $\langle s, t, \ell' \rangle$  such that  $\ell + \ell' > |s|$ . We have to show that  $\ell' > \ell''$ ,  $|r| - \ell'' \geq |s| - \ell'$  and  $s[1 \dots |s| - \ell'] = r[|r| - \ell'' - (|s| - \ell') + 1 \dots |r| - \ell'']$ . Because  $s$  is not a prefix of  $t$ ,  $\ell' < |s|$ . By definition, there are sequences  $u, v, w, x$ , and  $y$  such that  $r = uvw$ ,  $s = vwx$ ,  $t = wxy$ ,  $\ell = |vw|$ , and  $\ell' = |wx|$ . This implies

$$|w| = |v| + |w| + |w| + |x| - (|v| + |w| + |x|) = |vw| + |wx| - |vwx| = \ell + \ell' - |s| > 0.$$

Hence  $w$  is a non-empty suffix of  $r$  and a non-empty prefix of  $t$  which implies that  $\langle r, t, \ell'' \rangle$  is an *SPM* of length  $\ell'' = \ell + \ell' - |s|$ . As  $\ell' = |wx|$  and  $\ell'' = |w|$ , we conclude  $\ell' \geq \ell''$ . Assume that  $\ell' = \ell''$ . Then  $x = \varepsilon$  which implies that  $s = vw$  is a suffix of  $r$ . This contradicts the fact that  $\mathcal{R}$  is suffix-free. Thus our assumption was wrong, which implies  $\ell' > \ell''$ . Since  $s = vwx$ , we obtain  $|v| = |s| - \ell'$  and  $|r| \geq |v| + |w| = |s| - \ell' + \ell''$  from which we conclude  $|r| - \ell'' \geq |s| - \ell'$ . Moreover, from  $s = vwx$  and  $r = uvw$ , we derive  $s[1 \dots |s| - \ell'] = v = r[|r| - \ell'' - (|s| - \ell') + 1 \dots |r| - \ell'']$ .

“ $\Leftarrow$ ”: Suppose there is an  $s \in \mathcal{R}$  and an *SPM*  $\langle s, t, \ell' \rangle$  such that  $\ell' > \ell''$ ,  $|r| - \ell'' \geq |s| - \ell'$  and  $s[1 \dots |s| - \ell'] = r[|r| - \ell'' - (|s| - \ell') + 1 \dots |r| - \ell'']$ . We have to show that  $\langle r, t, \ell'' \rangle$  is

transitive. Let  $w, x$  be strings such that  $wx$  of length  $\ell' > 0$  is a suffix of  $s$  and a prefix of  $t$  and  $w$  of length  $\ell'' > 0$  is a suffix of  $r$  and a prefix of  $t$ . Let  $v = s[1 \dots |s| - \ell']$ . Then, by assumption,  $v = r[|r| - \ell'' - (|s| - \ell') + 1 \dots |r| - \ell'']$  and thus  $vw$  is a suffix of  $r$  and a prefix of  $s$ . We have  $|vw| = |s| - \ell' + \ell'' > 0$  and thus there is an *SPM*  $\langle r, s, \ell \rangle$  where  $\ell = |s| - \ell' + \ell''$ . Since  $\ell' = |wx|$  and  $\ell = |vw|$ , we conclude  $\ell + \ell' = |w| + |x| + |v| + |w| = |w| + |vwx| = |w| + |s| > |s|$ . So  $\langle r, t, \ell'' \rangle$  is transitive.

□

There is an even more stringent characterization of transitive *SPMs* based on a single irreducible *SPM*, as stated in the following theorem.

**Theorem 1** Let  $\langle r, t, \ell'' \rangle$  be an *SPM*. Then  $\langle r, t, \ell'' \rangle$  is transitive if and only if there is an  $s \in \mathcal{R}$  and an irreducible *SPM*  $\langle s, t, \ell' \rangle$  such that  $\ell' > \ell''$ ,  $|r| - \ell'' \geq |s| - \ell'$  and  $s[1 \dots |s| - \ell'] = r[|r| - \ell'' - (|s| - \ell') + 1 \dots |r| - \ell'']$ .

**Proof:**

“ $\Rightarrow$ ”: Let  $\langle r, t, \ell'' \rangle$  be transitive. Then, by Lemma 1, there is an  $s \in \mathcal{R}$  and an *SPM*  $\langle s, t, \ell' \rangle$  such that  $\ell' > \ell''$ ,  $|r| - \ell'' \geq |s| - \ell'$  and  $s[1 \dots |s| - \ell'] = r[|r| - \ell'' - (|s| - \ell') + 1 \dots |r| - \ell'']$ . Without loss of generality we assume that  $\ell'$  is maximal, i.e. for any  $s' \in \mathcal{R}$  and any *SPM*  $\langle s', t, q \rangle$  such that  $q > \ell''$ ,  $|r| - \ell'' \geq |s'| - q$  and  $s'[1 \dots |s'| - q] = r[|r| - \ell'' - (|s'| - q) + 1 \dots |r| - \ell'']$  holds, we have  $q \leq \ell'$ . Now assume that  $\langle s, t, \ell' \rangle$  is transitive. Then by Lemma 1, there is an  $s' \in \mathcal{R}$  and an *SPM*  $\langle s', t, q \rangle$  such that  $q > \ell'$ ,  $|s| - \ell' \geq |s'| - q$  and  $s'[1 \dots |s'| - q] = s[|s| - \ell' - (|s'| - q) + 1 \dots |s| - \ell']$ . First note that  $q > \ell'$  and  $\ell' > \ell''$  implies  $q > \ell''$ . Moreover,  $|r| - \ell'' \geq |s| - \ell' \geq |s'| - q$ . This implies  $|r| - \ell'' - (|s'| - q) + 1 \geq 1$ , i.e.  $r[|r| - \ell'' - (|s'| - q) + 1 \dots |r| - \ell'']$  is defined. From the two applications of Lemma 1 we conclude

$$\begin{aligned} s'[1 \dots |s'| - q] &= s[|s| - \ell' - (|s'| - q) + 1 \dots |s| - \ell'] \\ &= r[|r| - \ell'' - (|s| - \ell') + 1 + |s| - \ell' - (|s'| - q) \dots |r| - \ell''] \\ &= r[|r| - \ell'' - |s| + \ell' + 1 + |s| - \ell' - (|s'| - q) \dots |r| - \ell''] \\ &= r[|r| - \ell'' - (|s'| - q) + 1 \dots |r| - \ell'']. \end{aligned}$$

This implies  $q \leq \ell'$ , which is a contradiction. Hence our assumption that  $\langle s, t, \ell' \rangle$  is transitive was wrong. In other words,  $\langle s, t, \ell' \rangle$  is irreducible, which was to be shown.

“ $\Leftarrow$ ”: Suppose there is an  $s \in \mathcal{R}$  and an irreducible *SPM*  $\langle s, t, \ell' \rangle$  such that  $\ell' > \ell''$ ,  $|r| - \ell'' \geq |s| - \ell'$  and  $s[1 \dots |s| - \ell'] = r[|r| - \ell'' - (|s| - \ell') + 1 \dots |r| - \ell'']$ . Then by Lemma 1,  $\langle r, t, \ell'' \rangle$  is transitive.

□

## 7 Computation of non-redundant irreducible suffix-prefix matches

Algorithm 3 is a modification of Algorithm 2 (see main document) to output non-redundant irreducible *SPMs* only. The set  $W$  now contains pairs  $(j, D_j)$ , where  $j$  refers to the read with number  $j$  and  $D_j$  is the dictionary of left contexts of suffixes corresponding to terminal edges on the whole-read path for  $r_j$ . Whenever, on the whole-path for read  $r_j$ , a terminal edge outgoing from an lcp-interval  $itv$  and starting with  $\$p$  is detected,  $LCsearch(D_j, LC(r_p, itv.lcp))$  is called. The *SPM*  $\langle r_p, r_j, itv.lcp \rangle$  is output if and only if the function call returns false.

A dictionary is removed once an lcp-interval  $itv$  with  $itv.lcp < \ell_{min}$  is visited. This makes sense, as in this case no more *SPMs*  $\langle -, r_p, \ell \rangle$  satisfying  $\ell \geq \ell_{min}$  will be found.

$LCsearch(D, s)$  requires  $O(|s|)$  time. As the length of  $s$  is bounded by a constant, the running time of  $LCsearch(D, s)$  is constant. Hence, the total length of Algorithm 3 is  $O(n+z)$  where  $z$  is the number of processed *SPMs*.

## 8 Recognition of internally contained reads

The following lemma characterizes internally contained reads in terms of an lcp-interval tree.

**Lemma 2** Let  $\mathcal{R}$  be a suffix- and prefix-free read set with reads of length at least  $\ell_{min}$ . Let  $T$  be the lcp-interval tree of the *SPM*-relevant suffixes of all reads in  $\mathcal{R}$ . For any read  $r \in \mathcal{R}$ ,  $r$  is internally contained if and only if  $T$  contains an  $r$ -interval with exactly one terminal edge to a singleton whole-read interval representing  $r$ .

**Proof:**

“ $\Rightarrow$ ”: Suppose that  $r$  is internally contained. Then there is some read  $r'$  such that  $r' = urv$  for some non-empty strings  $u$  and  $v$ . As the first base of  $v$  is different from the sentinel with which  $r$  is padded, there is an  $r$ -interval  $[e..f]$  with an outgoing terminal edge to a singleton whole-read interval (representing  $r$ ). Suppose  $[e..f]$  has another outgoing terminal edge to a singleton whole-read interval (representing some read  $r''$ ). Then  $r = r''$ , which contradicts the assumption that  $\mathcal{R}$  is prefix- and suffix-free. Hence in  $T$  there is exactly one terminal edge outgoing from  $[e..f]$  and leading to a singleton whole-read interval.

“ $\Leftarrow$ ”: Suppose that in  $T$  there is an  $r$ -interval  $[e..f]$ , with exactly one terminal edge to a singleton whole-read interval representing read  $r$ . By construction  $[e..f]$  has another outgoing edge whose label  $v$  does not start with a sentinel. Suppose the  $rv$  is a prefix of some read. Then the path from  $[e..f]$  via the edge label  $v$  must lead to a singleton whole-read interval. Hence  $rvv'$  is a read for some string  $v'$ . Hence  $r$  is a prefix of a longer read, which contradicts the fact that  $\mathcal{R}$  is prefix-free. Hence  $rv$  is not a prefix of some read, but  $rvv'$  is a proper suffix of some read. Hence there is some non-empty string  $u$  such that  $urvv'$  is a read. Hence  $r$  is internally contained in  $urvv'$ .

□

---

**Algorithm 3** Bottom-up computation of all non-redundant irreducible suffix-prefix matches in  $\overline{\mathcal{R}}$ .

---

Input: table  $L$  and sorted array  $H$  of SPM-relevant suffixes of  $\overline{\mathcal{R}}$   
with common prefix  $u$  of length  $k$

Output: Non-redundant irreducible suffix-prefix matches  $\langle r, s, \ell \rangle$   
such that  $\ell \geq \ell_{min}$ ,  $r, s \in \overline{\mathcal{R}}$ ,  $u$  is a prefix of  $s$

- 1:  $T := []$  ▷ empty list
- 2:  $W := []$  ▷ empty list of pairs  $(i, D_i)$ ,  $1 \leq i \leq m$ ,  $D_i$  is a left-context dictionary
- 3: with each lcp-interval  $itv$  associate an integer  $itv.firstinW$
- 4: run Algorithm 1 with the following functions:
- 5: **function** *process\_leafedge*(*firstedge*, *itv*, (*p*, *q*)) ▷  $p$  is read number and  $q$  is offset
- 6:   **if**  $itv.lcp \geq \ell_{min}$  **then**
- 7:     **if** *firstedge* **then**
- 8:        $itv.firstinW := |W| + 1$
- 9:     **if**  $q = 0$  **then** ▷  $(p, q)$  refers to whole read
- 10:       create a new empty dictionary  $D_p$
- 11:       append  $(p, D_p)$  to  $W$
- 12:     **if**  $q + itv.lcp = |r_p|$  **then** ▷  $(p, q)$  refers to terminal edge
- 13:       append  $p$  to  $T$
- 14:   **else**
- 15:      $W := []$
- 16: **function** *process\_branchededge*(*firstedge*, *itv*, *itv'*)
- 17:   **if**  $itv.lcp \geq \ell_{min}$  **then**
- 18:     **if** *firstedge* **then**
- 19:        $itv.firstinW := itv'.firstinW$
- 20:   **else**
- 21:      $W := []$
- 22: **function** *process\_lcpinterval*(*itv*)
- 23:   **if**  $itv.lcp \geq \ell_{min}$  **then**
- 24:     **for all**  $p \in T$  **do**
- 25:       **for all**  $(j, D_j) \in W[itv.firstinW \dots |W|]$  **do**
- 26:         **if**  $LCsearch(D_j, LC(r_p, itv.lcp)) = \text{false}$  **then**
- 27:          $(d_p, p') := \text{if } p \leq m \text{ then } (\text{fwd}, p) \text{ else } (\text{rev}, p - m)$
- 28:          $(d_j, j') := \text{if } j \leq m \text{ then } (\text{fwd}, j) \text{ else } (\text{rev}, j - m)$
- 29:         **if**  $d_p = \text{fwd}$  **and**  $p' \leq j'$  **or**  $(d_p, d_j) = (\text{rev}, \text{fwd})$  **and**  $p' \geq j'$  **then** ▷ non-redundant?
- 30:         output  $\langle r_p, r_j, itv.lcp \rangle$
- 31:     $T := []$

---

Algorithm 4 exploits Lemma 2 to detect internally contained reads. After applying the algorithm to all buckets of SPM-relevant suffixes, IC is the set of reads in  $\mathcal{R}$  which are internally contained.

---

**Algorithm 4** Bottom-up determination of internally contained reads

---

Input: table  $L$  and sorted array  $H$  of SPM-relevant suffixes in the  $i$ th bucket  
with common prefix  $u$  of length  $k$

Output: Set IC of reads  $r_i$  which have prefix  $u$  and are internally contained.

- 1: IC :=  $\emptyset$
  - 2: run Algorithm 1 of main document with the following function (*process\_branchedge* and *process\_lcpinterval* are not needed):
  - 3: **function** *process\_leafedge*(*firstedge*, *itv*, ( $p, q$ ))   ▷  $p$  is read number and  $q$  is read offset
  - 4:     **if**  $q + itv.lcp = |r_p|$  **and**  $q = 0$  **then**
  - 5:         IC := IC  $\cup$   $\{r_p\}$
- 

Note that the conditions checked in line 4 of Algorithm 4 are the same as in line 9 and 11 of Algorithm 2 given in the main document. This allows to conveniently merge the two algorithms, in order to compute suffix-prefix matches and recognize internally contained reads by scanning the index structure only once.

## 9 Performance on variable length datasets

The results presented in the main document refer to read sets in which each read has the same length (100 bp). This situation is common for datasets obtained by the Illumina sequencing platforms. Read in datasets from asynchronous sequencing technologies, such as Roche 454, vary in their lengths. Here we present a benchmark on a read set with reads of variable length.

Dataset c22\_454 was generated taking human chromosome 22 as a template, with  $20\times$  coverage and read lengths randomly sampled from the distribution of read lengths of a real-world 454 dataset (obtained from the Short Read Archive, accession DRR000841).

The reads were assembled using *Readjoinder*, LEAP and SGA. Results are shown Table 6. Edena was excluded from this benchmark as it requires reads of equal length.



Table 6: Results of applying *Readjoinder* (RJ), SGA and LEAP to the dataset c22\_454. ( $\ell_{min} = 45$ ). The readset consists of 2.0 million reads with a total length of 697.9 Mbp. Read length is variable, between 26 bp and 637 bp.

| Benchmark results          |                 |                 |                 |
|----------------------------|-----------------|-----------------|-----------------|
|                            | RJ              | SGA             | LEAP            |
| Running time (s)           | 477             | 6324            | 1000            |
| Space peak (Mb)            | 245             | 343             | 550             |
| Assemblathon metrics       |                 |                 |                 |
|                            | RJ              | SGA             | LEAP            |
| Number of contigs          | 16572           | 26158           | 26204           |
| Genome size (bp.)          | 34894545        | 34894545        | 34894545        |
| Total contigs length       | 42073401        | 45137152        | 42348355        |
| - as % of genome           | 120.57          | 129.35          | 121.36          |
| Mean contig size           | 2538.82         | 1725.56         | 1616.10         |
| Median contig size         | 907             | 588             | 781             |
| Longest contig             | 73334           | 73334           | 47718           |
| Shortest contig            | 395             | 92              | 250             |
| Contigs > 500 bp           | 16243 (98.01 %) | 18438 (70.49 %) | 22720 (86.70 %) |
| Contigs > 1K bp            | 7353 (44.37 %)  | 6947 (26.56 %)  | 10730 (40.95 %) |
| Contigs > 10K bp           | 830 (5.01 %)    | 793 (3.03 %)    | 343 (1.31 %)    |
| N50                        | 6155            | 5089            | 2786            |
| L50                        | 1694            | 2037            | 3644            |
| NG50                       | 8085            | 7674            | 3735            |
| LG50                       | 1182            | 1219            | 2471            |
| Plantagora metrics         |                 |                 |                 |
|                            | RJ              | SGA             | LEAP            |
| Covered Bases              | 34789523        | 34781707        | 24513730        |
| Ambiguous Bases            | 84743           | 81574           | 430827          |
| Misassemblies              | 2               | 0               | 11551           |
| Misassembled Contigs       | 1               | 0               | 6986            |
| Misassembled Contigs Bases | 836             | 0               | 15569182        |
| SNPs                       | 18              | 7               | 50856           |
| Insertions                 | 0               | 0               | 2584            |
| Deletions                  | 0               | 0               | 4842            |
| Positive Gaps              | 203             | 231             | 3490            |
| Internal Gaps              | 0               | 0               | 3               |
| External Gaps              | 203             | 231             | 3487            |
| - total length             | 109027          | 117608          | 5159684         |
| - average length           | 537             | 509             | 1480            |
| Negative Gaps              | 15936           | 24987           | 11853           |
| Internal Overlaps          | 0               | 0               | 18              |
| External Overlaps          | 15936           | 24987           | 11835           |
| - total length             | -6988125        | -9831815        | -6982471        |
| - average length           | -439            | -393            | -590            |
| Redundant Contigs          | 74              | 160             | 12388           |
| Unaligned Contigs          | 30              | 77              | 19              |
| - partial                  | 0               | 4               | 20              |
| - total length             | 25141           | 52808           | 11833           |
| Ambiguous Contigs          | 297             | 638             | 318             |
| - total length             | 206437          | 350265          | 188769          |

## 10 An example of a set of SPM-relevant suffixes and the corresponding lcp-interval tree

Consider the readset  $\mathcal{R} = \{aact, actt, ataa, aaca\}$ . We have the following non-empty suffixes, of which the  $(\ell_{min}, k)$ -SPM-relevant suffixes for  $\ell_{min} = 2$  and  $k = 1$  are underlined.

|             |             |             |             |
|-------------|-------------|-------------|-------------|
| <u>aact</u> | <u>actt</u> | <u>ataa</u> | <u>aaca</u> |
| <u>act</u>  | ctt         | taa         | <u>aca</u>  |
| ct          | tt          | <u>aa</u>   | ca          |
| t           | t           | a           | a           |

As all reads begin with  $a$ , there is only one bucket with all SPM-relevant suffixes. The following table shows the SPM-relevant suffixes in lexicographic order, including the lcp-values. Note that the sentinels are explicitly shown as they are relevant for the lexicographic order.

| $j$ | $H_j$ as pair | $H_j$ as string             | $L_j$ |
|-----|---------------|-----------------------------|-------|
| 0   | (4, 1)        | <i>aaca</i> \$ <sub>4</sub> |       |
| 1   | (1, 1)        | <i>aact</i> \$ <sub>1</sub> | 3     |
| 2   | (3, 3)        | <i>aa</i> \$ <sub>3</sub>   | 2     |
| 3   | (4, 2)        | <i>aca</i> \$ <sub>4</sub>  | 1     |
| 4   | (2, 1)        | <i>actt</i> \$ <sub>2</sub> | 2     |
| 5   | (1, 2)        | <i>act</i> \$ <sub>1</sub>  | 3     |
| 6   | (3, 1)        | <i>ataa</i> \$ <sub>3</sub> | 1     |

Here is the lcp-interval tree, represented by table  $S$  and  $L$ . The leaves are marked by the suffixes (in form of read number and read offset) they refer to. The notation  $\ell$ -[ $e..f$ ] refers to the lcp-interval [ $e..f$ ] of lcp-value  $\ell$ .

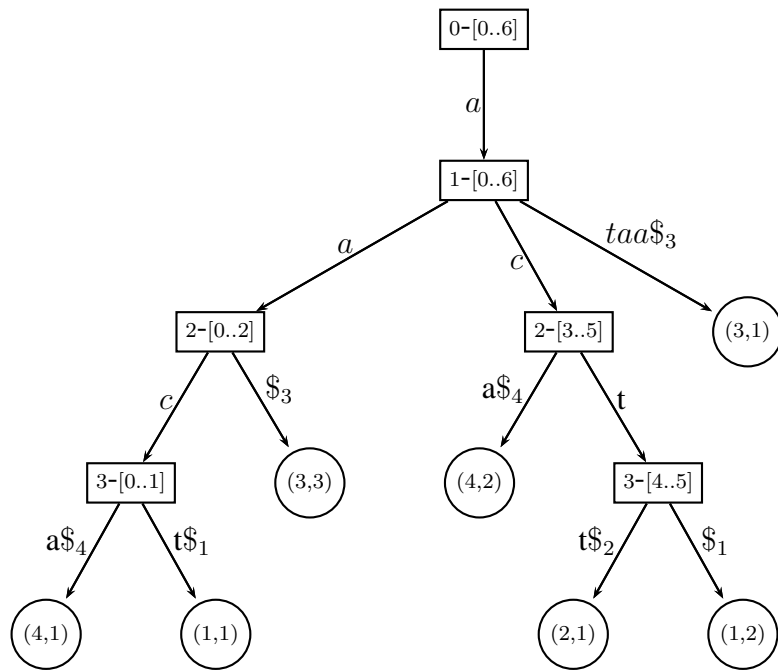

This is the list of lcp-intervals and singleton intervals, in the order in which they are processed:

(4, 1), (1, 1), 3-[0..1], (3, 3), 2-[0..2], (4, 2), (2, 1), (1, 2), 3-[4..5], 2-[3..5], (3, 1), 1-[0..6], 0-[0..6]

## References

- [1] M.I. Abouelhoda, S. Kurtz, and E. Ohlebusch. Replacing suffix trees with enhanced suffix arrays. *Journal of Discrete Algorithms*, 2:53–86, 2004.
