# Supplementary material for: Readjoiner: a fast and memory efficient string graph-based sequence assembler
Source: Springer Nature journal article supplement (doi:10.1186/1471-2105-13-82), 2012-05-06
Supplement: 12859_2011_5454_MOESM3_ESM.pdf [file 12859_2011_5454_MOESM3_ESM.pdf]

Input: table  $L$  and sorted array  $H$  of SPM-relevant suffixes  
with common prefix  $u$  of length  $k$   
generic function *process* to postprocess an SPM

Output: All suffix-prefix matches  $\langle r, s, \ell \rangle$   
such that  $\ell \geq \ell_{min}$  and  $u$  is a prefix of  $s$

```
1:  $T := []$  ▷ empty list
2:  $W := []$  ▷ empty list
3: with each lcp-interval associate an integer  $itv.firstinW$ 
4: run Algorithm 1 with the following functions:
5: function process_leafedge(firstedge, itv, (p, q)) ▷  $p$  is read number and  $q$  is offset
6:   if  $itv.lcp \geq \ell_{min}$  then
7:     if firstedge then
8:        $itv.firstinW := |W| + 1$ 
9:     if  $q = 0$  then ▷ ( $p, q$ ) refers to whole read
10:      append  $p$  to  $W$ 
11:     if  $q + itv.lcp = |r_p|$  then
12:      append  $p$  to  $T$ 
13:   else
14:      $W := []$ 
15: function process_branchededge(firstedge, itv, itv')
16:   if  $itv.lcp \geq \ell_{min}$  then
17:     if firstedge then
18:        $itv.firstinW := itv'.firstinW$ 
19:   else
20:      $W := []$ 
21: function process_lcpinterval(itv)
22:   if  $itv.lcp \geq \ell_{min}$  then
23:     for all  $p \in T$  do
24:       for all  $j \in W[itv.firstinW \dots |W|]$  do
25:         process  $\langle r_p, r_j, itv.lcp \rangle$  ▷ call generic function to process SPMs
26:    $T := []$ 
```
