# Supplementary material for: Readjoiner: a fast and memory efficient string graph-based sequence assembler
Source: Springer Nature journal article supplement (doi:10.1186/1471-2105-13-82), 2012-05-06

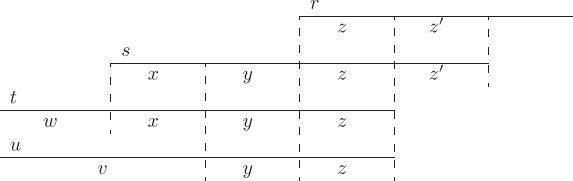

Supplement: 12859_2011_5454_MOESM6_ESM.pdf [file 12859_2011_5454_MOESM6_ESM.pdf]
